# Supplementary material
Source: PubMed Central journal article supplement (PMC3548985)
Supplement: NIHMS406167-supplement-Supplementary_Data_Table.pdf [file NIHMS406167-supplement-Supplementary_Data_Table.pdf]

**Supplementary Table 1.** Fatty acid profile of fish oil fed salmon (FO), soybean oil fed salmon (SO) and vegetable oils used in mice diets.

| FA (%)    | Atlantic salmon |           | Vegetable oils |             |               |          |
|-----------|-----------------|-----------|----------------|-------------|---------------|----------|
|           | FO salmon       | SO salmon | Olive oil      | Coconut oil | Safflower oil | Flax oil |
| 6:0       | -               | -         | -              | 0.7         | -             | -        |
| 8:0       | -               | -         | -              | 8.2         | -             | -        |
| 10:0      | -               | -         | -              | 6.5         | -             | -        |
| 12:0      | -               | -         | -              | 41.8        | -             | -        |
| 14:0      | 4.2             | 0.7       | -              | 20.4        | 0.1           | -        |
| 15:0      | 0.3             | -         | -              | -           | -             | -        |
| 16:0      | 15.7            | 13.8      | 10.0           | 10.1        | 6.8           | 5.2      |
| 17:0      | 0.3             | 0.1       | 0.1            | -           | -             | -        |
| 18:0      | 3.3             | 4.5       | 3.0            | 3.5         | 2.6           | 5.8      |
| 20:0      | 0.2             | 0.3       | 0.4            | 0.2         | 0.3           | 0.2      |
| 22:0      | -               | 0.1       | 0.1            | -           | 0.3           | 0.2      |
| 24:0      | -               | -         | -              | 0.1         | 0.1           | 0.1      |
| SFA       | 23.9            | 19.5      | 13.9           | 91.5        | 10.2          | 11.5     |
| 16:1n-9   | 0.3             | 0.2       | 0.1            | -           | -             | -        |
| 16:1n-7   | 3.5             | 0.8       | 0.6            | -           | -             | -        |
| 18:1n-11  | 1.4             | 0.2       | -              | -           | -             | -        |
| 18:1n-9   | 8.4             | 16.5      | 75.8           | 6.8         | 12.2          | 17.9     |
| 18:1n-7   | 2.1             | 1.8       | 1.7            | 0.1         | 0.7           | 0.6      |
| 20:1n-11  | 0.9             | 0.2       | -              | -           | -             | -        |
| 20:1n-9   | 5.8             | 1.4       | 0.3            | -           | 0.2           | 0.1      |
| 20:1n-7   | 0.2             | -         | -              | -           | -             | -        |
| 22:1n-11  | 7.8             | 1.1       | -              | -           | -             | -        |
| 22:1n-9   | 0.6             | 0.2       | -              | -           | -             | -        |
| 24:1n-9   | 0.6             | 0.2       | -              | -           | -             | -        |
| MUFA      | 31.5            | 22.6      | 78.6           | 6.9         | 13.0          | 18.6     |
| 18:2n-6   | 2.6             | 30.2      | 6.7            | 1.9         | 76.0          | 14.4     |
| 20:2n-6   | 0.3             | 2.2       | -              | -           | -             | -        |
| 20:3n-6   | 0.2             | 2.0       | -              | -           | -             | -        |
| 20:4n-6   | 1.0             | 1.3       | -              | -           | -             | -        |
| Total n-6 | 4.1             | 35.7      | 6.7            | 1.9         | 76.0          | 14.4     |
| n-6 HUFA  | 1.3             | 3.5       | -              | -           | -             | -        |
| 18:3n-3   | 1.0             | 3.4       | 0.6            | -           | 0.2           | 55.2     |
| 18:4n-3   | 1.3             | 0.5       | -              | -           | -             | -        |
| 20:4n-3   | 1.2             | 0.6       | -              | -           | -             | -        |
| 20:5n-3   | 8.4             | 3.3       | -              | -           | -             | -        |
| 22:5n-3   | 2.4             | 0.9       | -              | -           | -             | -        |
| 22:6n-3   | 23.3            | 12.4      | -              | -           | -             | -        |
| Total n-3 | 37.5            | 21.1      | 0.6            | -           | 0.2           | 55.2     |
| n-3 HUFA  | 35.3            | 17.2      | -              | -           | -             | -        |
